# Supplementary material for: Optical crystallographic study of piezoelectric KxNa1−xNbO3 (x = 0.4, 0.5 and 0.6) single crystals using linear birefringence
Source: Royal Society of Chemistry journal article supplement (doi:10.1039/c3ce40627j), 2013-01-01
Supplement: c3ce40627j.pdf [file c3ce40627j.pdf]

**Supplementary Document To: Optical crystallographic Study of Piezoelectric  $K_xNa_{1-x}NbO_3$   
( $x = 0.4, 0.5$  &  $0.6$ ) Single Crystals using Linear Birefringence**

**1. Crystal Growth, Compositional and Orientation Determination -**

Figure 1(a) shows the optical image of as grown crystals ( $x = 0.5$ ) embedded in the re-solidified flux. By successive boiling and treating by ultrasonic waves in water, crystals were separated from flux. Crystal with a cubic geometry were found to have maximum dimensions of about 6 mm X 6 mm X 2 mm. Figure 1(b) shows one of the crystal ( $x = 0.5$ ) having planer dimensions of about 5 mm X 5 mm. After compositional homogenization by annealing at 1000°C, energy dispersive X-ray analysis (EDX) was performed to confirm the composition of crystals. Figure 2 shows the atomic mole % of Na and K ions in the crystals of three batches ( $x = 0.4, 0.5$  and  $0.6$ ). For optical birefringence study, crystals with higher transparency were chosen from each batch of  $x = 0.4, 0.5$  and  $0.6$  respectively.

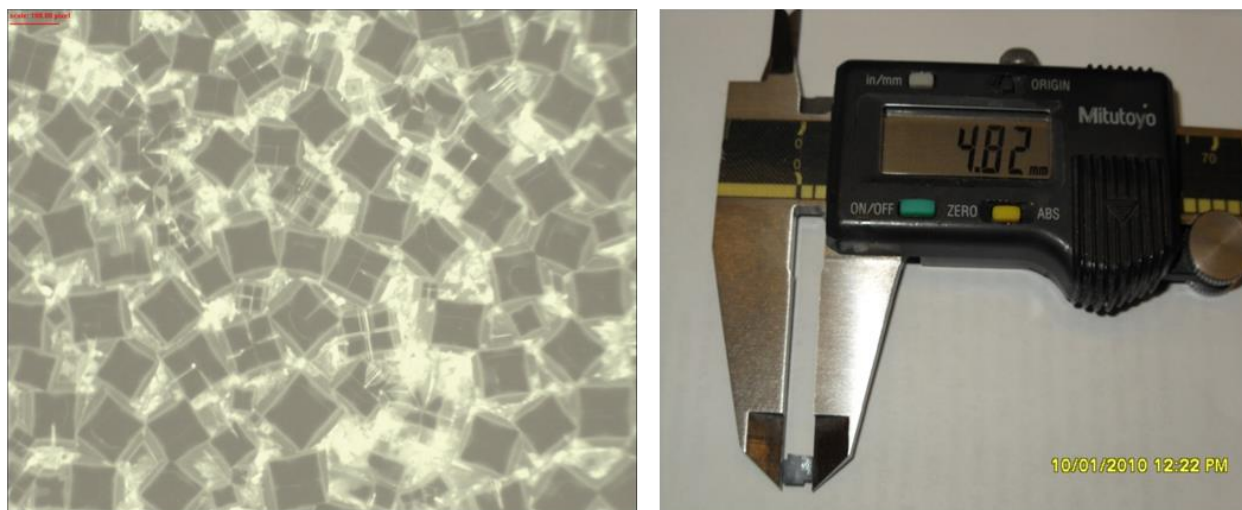

Figure 1 Optical images showing (a) as grown crystals in KF – NaF matrix (b) One of the large size crystals.

## EDX Analysis

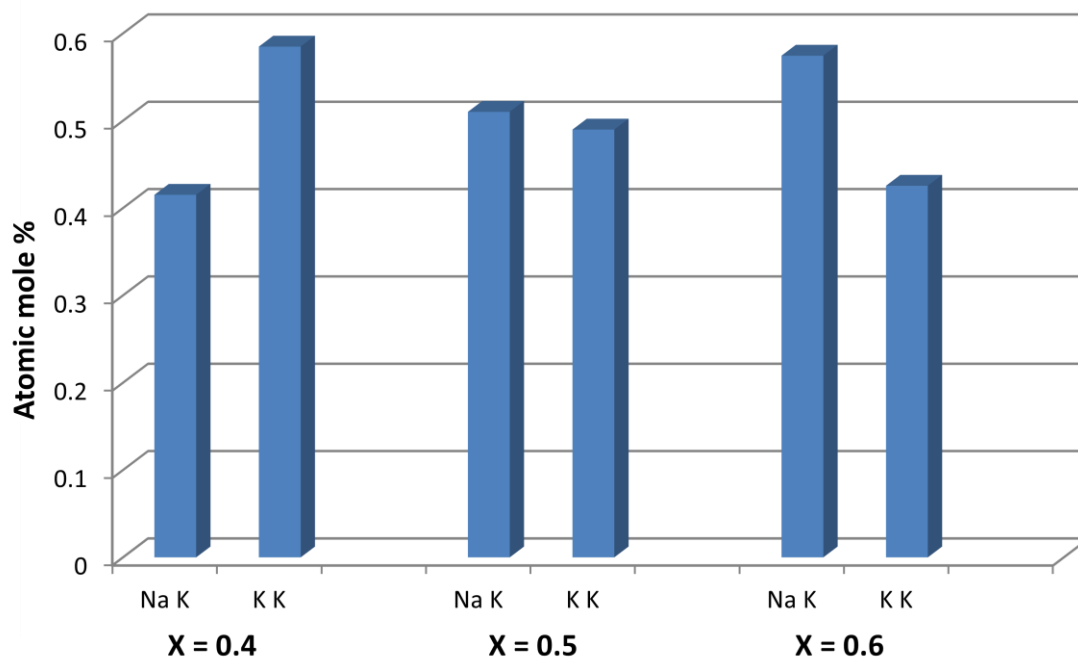

Figure 2 Energy dispersive X-ray (EDX) analysis performed on crystals intended to have composition  $x = 0.4, 0.5$  and  $0.6$ .

Figure 3 shows x-ray diffraction pattern obtained for one of the major faces of a crystal ( $x = 0.5$ ), confirming these crystals to be  $\{100\}_{pc}$  oriented. This observation was further confirmed by electron backscattered diffraction analysis (EBSD) performed on two opposite major faces of these crystals.

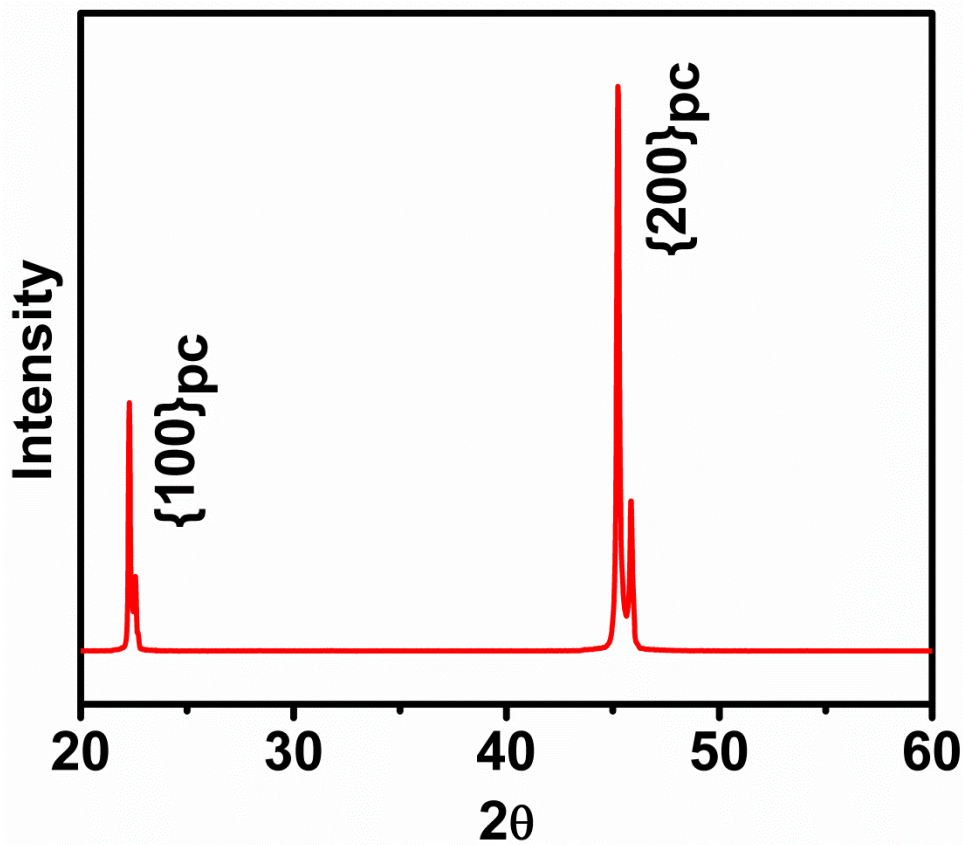

Figure 3 x-ray diffraction pattern showing the presence of only {100} family peaks.

## 2. Birefringence Measurements –

Figure 4 shows the schematic diagram of the Metripol birefringence measurement system.<sup>1</sup>

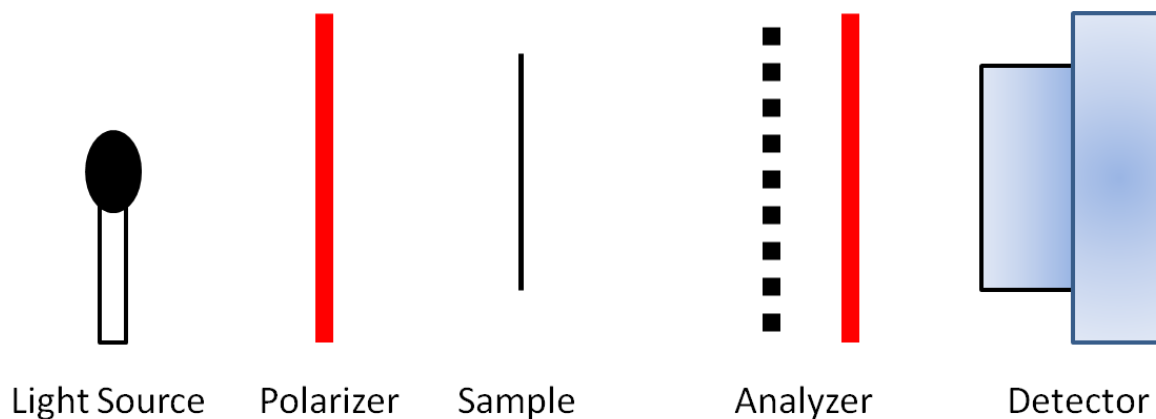

Figure 4 Schematic diagram of Metripol birefringence measurement system.

It consists of a monochromatic light source, a rotating polarizer followed by a sample stage. The transmitted light is allowed to go to the circular analyzer followed by a CCD detector. Intensity measured at each pixel of detector is given by Equation 1.<sup>1</sup>

$$I = I_o/2[1 + \text{Sin}(2\alpha - 2\varphi)\text{Sin}\delta]$$

Or

$$I = \frac{1}{2}I_o + \frac{1}{2}I_o \text{Sin}\delta \text{Cos}2\varphi \text{Sin}2\alpha - \frac{1}{2}I_o \text{Sin}\delta \text{Sin}2\varphi \text{Cos}2\alpha \quad (1)$$

Where  $I_o$  and  $\varphi$  are the transmittance of the sample and the angle between the minor axis of the indicatrix with an arbitrary coordination axis, respectively.  $\delta$  is the phase difference introduced by the crystal to the transmitted light ray. To determine the values of all three components  $I_o$ ,  $|\text{Sin}\delta|$ , and  $\varphi$ , the intensity of the transmitted light is measured for different values of the rotation angle  $\alpha$  which the polarizer makes from a fixed reference.

Least square fitting method is used to determine the three parameters of interest, according to equation (2)<sup>1</sup>

$$y(x) = a_o + a_1\text{Sin}x + a_2 \text{Cos}x \quad (2)$$

On comparing it with equation (1), “a” parameters are found to be

$$\begin{aligned} a_o &= \frac{1}{2}I_o \\ a_1 &= \frac{1}{2}I_o \text{Sin}\delta \text{Cos}2\varphi \\ a_2 &= \frac{1}{2}I_o \text{Sin}\delta \text{Sin}2\varphi \end{aligned} \quad (3)$$

If the polarizer is stepped through N steps in the process of collecting data, “a” parameters can be given as in equation (4).

$$a_0 = \sum_{i=1}^N \frac{1}{N} y_i$$

$$a_1 = \sum_{i=1}^N \frac{2}{N} y_i \sin x_i$$

$$a_2 = \sum_{i=1}^N \frac{2}{N} y_i \cos x_i \quad (4)$$

Values for two parameters of interest  $|\sin\delta|$  and  $\varphi$  can be determined from values of parameters “a” according to equation (5).<sup>1</sup>

$$|\sin\delta| = \frac{\sqrt{(a_1^2 + a_2^2)}}{a_0}$$

$$\varphi = \frac{1}{2} \arcsin\left(-\frac{a_2}{\sqrt{(a_1^2 + a_2^2)}}\right) \quad (5)$$

### 3. Determination of Orientation Histogram –

To obtain the orientation histograms for three ( $x = 0.4, 0.5$  and  $0.6$ ) compositions at different temperatures,  $\varphi$  false color images were obtained from an area of about  $2.5 \text{ mm} \times 1.9 \text{ mm}$ . Each of these images consisted of about 1.39 million ( $1360 \times 1024$ ) pixels, each representing a value of  $\varphi$  between  $0^\circ - 180^\circ$ . Each histogram was created using these 1.39 millions  $\varphi$  values with the bin size of  $1^\circ$ .

### 4. Reference -

1. A. M. Glazer, J. G. Lewis and W. Kaminsky, *Proceedings: Mathematical, Physical and Engineering Sciences*, 1996, **452**, 2751-2765.
